# Supplementary material for: CD62L is not a reliable biomarker for predicting PML risk in natalizumab-treated R-MS patients
Source: PubMed Central journal article supplement — Neurology. 2016 Jan 26;86(4):375–81. doi: 10.1212/WNL.0000000000002314 (PMC4776091; doi:10.1212/wnl.0000000000002314), 2016-01-26
Supplement: supp_WNL.0000000000002314_Supplemental_data.pdf [file supp_WNL.0000000000002314_Supplemental_data.pdf]

## **Lieberman et al. Supplemental Figure legends**

**Figure e-1:** *Gating strategy for %CD62L analysis.* Doublet cells were excluded from the analysis. A gate on total lymphocytes was set followed by a subgate on the live lymphocytes. Live lymphocytes were then gated for CD3+ T cells and subsequently gated to separate the CD4+ and CD8+ cells. The CD4+ (Q3) cells were then plotted as CD45RA vs CD62L to assess the maturity of the T cells. A histogram of total %CD62L+ can be seen on the final histogram.

**Figure e-2** Low forward scatter lymphocytes are predominately Annexin V+ and CD62L-, high forward scatter lymphocytes are predominately Annexin V- and CD62L+. 10 controls frozen PBMCs were for lymphocyte Annexin V, 7-AAD and CD62L staining in the CD4+ population.

**Figure e-3** %live lymphocytes did not differ in natalizumab-treated non-PML and pre-PML samples (p=.6517).

**Figure e-4** Technical replicates are excellent in the modified %CD62L assay. Frozen PBMCs from 2 healthy donors were assessed in each of 5 runs in which the study data was collected as a measure of staining quality, FACS machine set up and general reproducibility.

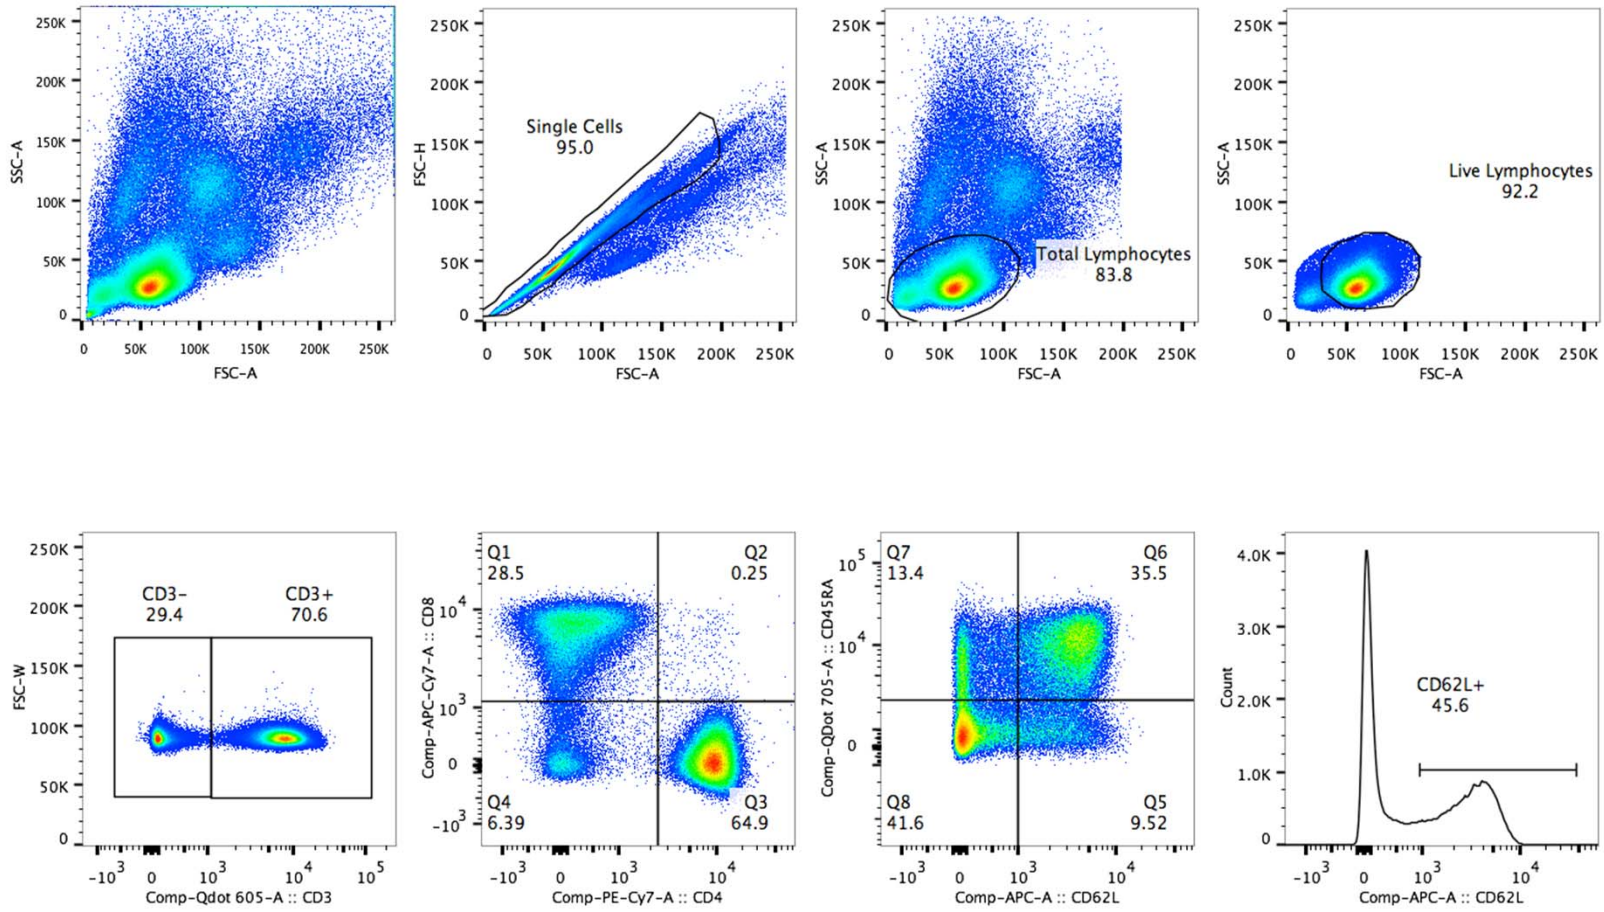

Figure e-1

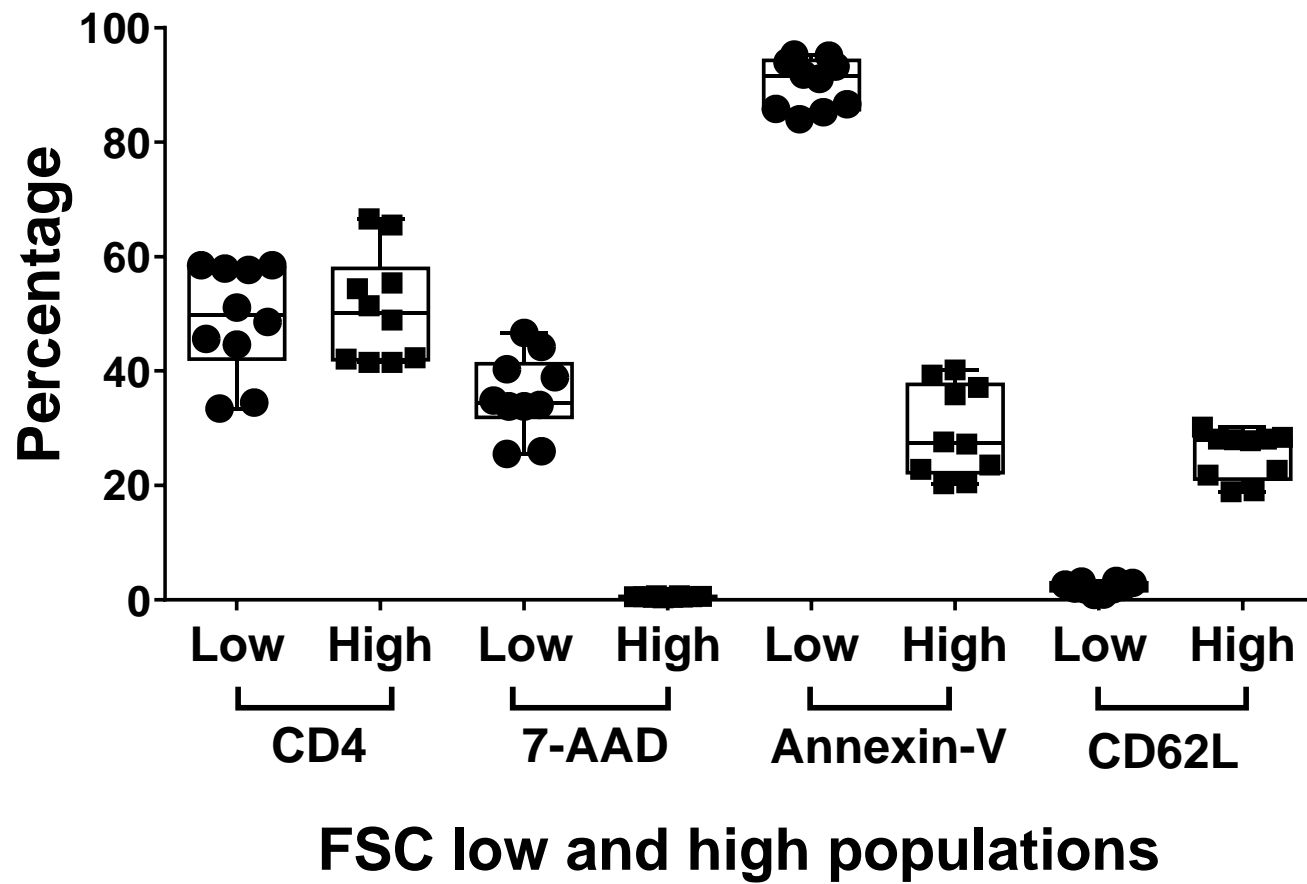

Figure e-2

No difference in lymphocyte viability in non-PML natalizumab (NTZ) control or pre-PML samples

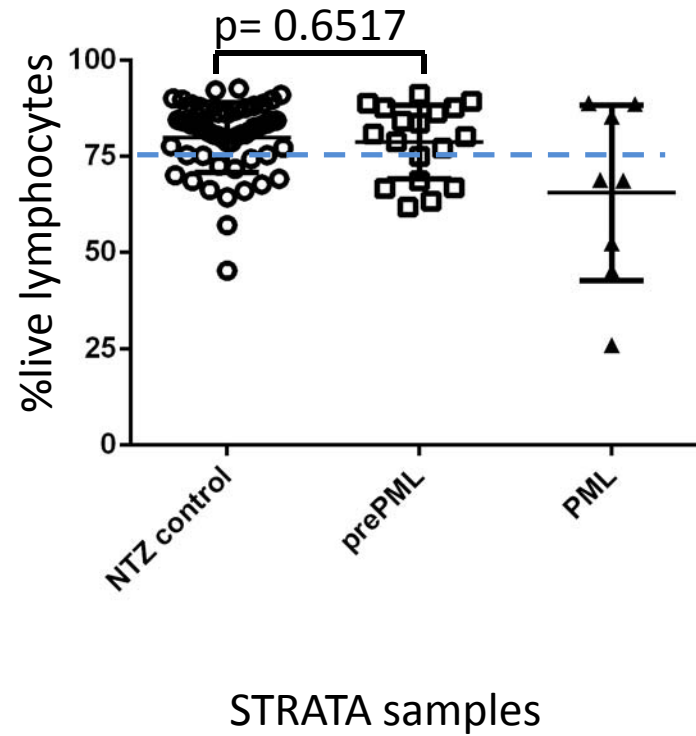

Figure e-3

| <b>Parameters</b>    | <b>Muenster</b>         | <b>Biogen</b>                | <b>Notes</b>                                                                                         |
|----------------------|-------------------------|------------------------------|------------------------------------------------------------------------------------------------------|
| NTZ treated patients | 9 sites                 | case-control clinical trials | Biogen matched controls for age, gender, NTZ doses, location                                         |
| Samples              | frozen PBMCs            | frozen PBMCs                 | sample processing has impact, BIIB trial samples processed at CRO                                    |
| Anti-coagulant       | EDTA                    | Heparin                      | No Change to CD62L staining                                                                          |
| Thaw conditions      | PBS                     | PBS + Benzonase              | No Change to CD62L staining                                                                          |
| Staining Buffer      | 1XPBS,0.5%BSA, 2mM EDTA | 1XPBS,2%FBS, 0.1% Azide      | No Change to CD62L staining                                                                          |
| Staining Conditions  | 10 min. at RT           | 30 min. on ice               | No Change to CD62L staining                                                                          |
| Antibody             | DREG-56                 | DREG-56                      | identical clone                                                                                      |
| Wash                 | 1x                      | 3x                           | Less variable background with 3x wash                                                                |
| Fixative             | none                    | 2% paraformaldehyde          | Fix provides better reproducibility and stability, Biogen assay is not time sensitive to measurement |

Biogen successfully modified the %CD62L assay to standardize the assay, improve reproducibility and eliminate the necessity to analyze the samples within 10 minutes of staining. The impact of changes in the assay on %CD62L, in direct comparisons to that published (Schwab et al. 2013), was minimal and is outlined above.

Table e-1

### Reproducibility of Biogen Assay

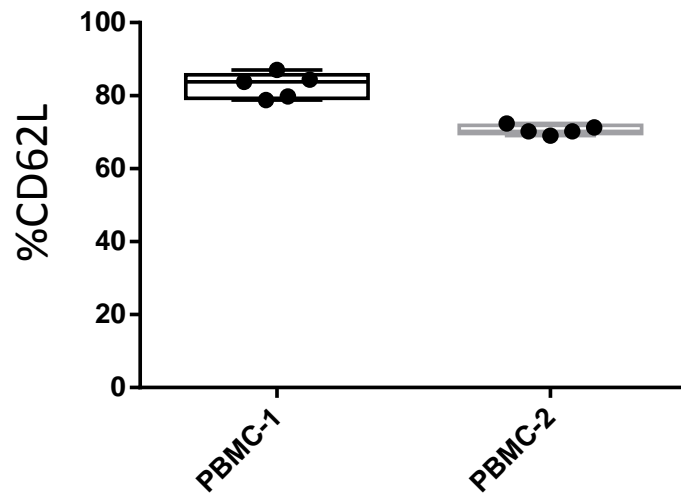

Frozen PBMCs from 2  
healthy donors assayed on 5  
different days

Figure e-4
